# Supplementary material for: Microalgae and Biochar Agro-Fertilization of the Palestinian Rehan Barley Cultivar under Salinity Stress
Source: MDPI journal article supplement (doi:10.3390/agronomy11112309), 2021-11-15
Supplement: s1 [file s1]

**Table S5.** Germination percentage of ten barely cultivars growing in Palestine under the effect of 0, 50, 85 and 175 mM NaCl ([45], unpublished work).

| NaCl<br>[mM]                                                   | Rehan     | Icarda1    | Icarda 15      | Baladi     | Improved<br>Baladi | Acsad 176  | Acsad<br>1732 | Acsad 68   | Acsad<br>1417 | Acsad174<br>4 |
|----------------------------------------------------------------|-----------|------------|----------------|------------|--------------------|------------|---------------|------------|---------------|---------------|
| O                                                              | 97% ± 0.6 | 93% ± 0.58 | 47% ± 0.58     | 80% ± 1    | 54% ± 2.52         | 70% ± 2    | 97% ± 0.58    | 87% ± 0.58 | 97% ± 0.58    | 87% ± 0.58    |
| 50                                                             | 90% ± 1   | 80% ± 0    | 47% ±<br>1.154 | 93% ± 1.15 | 13% ±<br>1.527     | 70% ± 0    | 83% ± 0.58    | 67% ± 2.08 | 80% ± 1       | 97% ± 0.58    |
| 85                                                             | 90% ± 1   | 90% ± 1    | 40% ± 1        | 73% ± 2.52 | 18% ±<br>1.154     | 47% ± 2.08 | 83% ± 0.58    | 73% ± 0.58 | 87% ± 0.58    | 83% ± 0.58    |
| 120                                                            | 67% ± 1.5 | 80% ± 0    | 20% ± 1        | 70% ± 1    | 13% ± 0            | 43% ± 0.57 | 87% ± 1.53    | 50% ± 1    | 83% ± 1.15    | 80% ± 1       |
| 175                                                            | 40% ± 1   | 60% ± 2.65 | 20% ± 1        | 37% ± 1.15 | 0% ± 1.527         | 37% ± 1.15 | 80% ± 1       | 27% ± 0.58 | 63% ± 1.15    | 63% ± 0.58    |
| Value represent mean ± standard deviation in categories column |           |            |                |            |                    |            |               |            |               |               |
