# Supplementary material for: Microalgae and Biochar Agro-Fertilization of the Palestinian Rehan Barley Cultivar under Salinity Stress
Source: MDPI journal article supplement (doi:10.3390/agronomy11112309), 2021-11-15
Supplement: s1 [file s1]

**Table S1.** The effects of different combinations of salinity levels and fertilizer types on early growth stage (7 weeks) for Rehan barley cultivar.

| Plant growth parameters |          | Fertilizers + Salinity Concentrations (EC) |          |          |          |        |          |          |        |          |          |          |          | Sig.  |   |    |
|-------------------------|----------|--------------------------------------------|----------|----------|----------|--------|----------|----------|--------|----------|----------|----------|----------|-------|---|----|
|                         |          | SoMi513                                    |          | MIN      |          |        |          | ALG      |        |          |          | BIO      |          |       |   |    |
|                         |          |                                            |          | 0        | 4        | 8      | 16       | 0        | 4      | 8        | 16       | 0        | 4        |       | 8 | 16 |
| No. Of tillers          | 8        | 12.50                                      | 10.00    | 9.33     | 11.33    | 1.00   | 2.33     | 2.00     | 1.33   | 9.17     | 8.33     | 4.17     | 6.75     | 0.000 |   |    |
|                         | (2.76)   | (3.08)                                     | (1.67)   | (2.73)   | (6.56)   | (0.00) | (1.21)   | (1.55)   | (0.82) | (3.43)   | (2.34)   | (1.47)   | (4.91)   |       |   |    |
| No. of ears             | 2.33     | 2.17                                       | 4.17     | 3.83     | 2.67     | 0.00   | 0.00     | 0.33     | 0.00   | 4.67     | 2.17     | 2.83     | 3.00     | 0.000 |   |    |
|                         | (1.51)   | (2.40)                                     | (1.94)   | (2.79)   | (2.16)   | (0.00) | (0.00)   | (0.52)   | (0.00) | (1.21)   | (1.47)   | (1.72)   | (0.89)   |       |   |    |
| Leaf area [cm²]         | 802.52   | 658.44                                     | 401.28   | 384.08   | 661.95   | 3.10   | 101.00   | 22.39    | 3.11   | 275.50   | 374.74   | 323.90   | 124.04   | 0.000 |   |    |
|                         | (178.08) | (2.40)                                     | (209.11) | (66.87)  | (183.37) | (0.30) | (69.52)  | (20.24)  | (0.79) | (157.98) | (153.60) | (152.46) | (28.06)  |       |   |    |
| Shoot dry weight [g]    | 6.48     | 6.27                                       | 4.91     | 6.10     | 4.56     | 0.03   | 0.51     | 0.45     | 0.01   | 7.23     | 6.02     | 5.20     | 2.71     | 0.000 |   |    |
|                         | (1.43)   | (2.16)                                     | (2.28)   | (1.71)   | (1.23)   | (0.01) | (0.40)   | (0.49)   | (0.01) | (1.41)   | (3.23)   | (1.09)   | (1.63)   |       |   |    |
| Root dry weight [g]     | 3.6217   | 3.57                                       | 2.54     | 3.53     | 1.42     | 0.01   | 0.12     | 0.10     | 0.01   | 2.76     | 2.91     | 3.02     | 1.10     | 0.000 |   |    |
|                         | (2.57)   | (2.83)                                     | (1.99)   | (4.73)   | (1.42)   | (0.00) | (0.12)   | (0.11)   | (0.00) | (2.86)   | (2.34)   | (3.43)   | (1.30)   |       |   |    |
| Shoot/Root dry weight   | 2.905    | 2.88                                       | 4.43     | 5.24     | 4.94     | 2.50   | 6.42     | 3.83     | 1.33   | 11.36    | 3.22     | 4.78     | 5.65     | 0.294 |   |    |
|                         | (2.03)   | (2.02)                                     | (4.45)   | (4.57)   | (2.53)   | (1.38) | (4.05)   | (2.30)   | (0.52) | (16.32)  | (1.93)   | (3.81)   | (3.91)   |       |   |    |
| Root length [cm]        | 6272.68  | 4944.96                                    | 3216.71  | 3778.49  | 3316.95  | 36.23  | 1047.78  | 466.28   | 36.10  | 5496.62  | 5080.93  | 4632.77  | 2902.83  | 0.000 |   |    |
|                         | (242.19) | (454.65)                                   | (314.92) | (373.68) | (140.13) | (7.44) | (692.02) | (469.36) | (5.41) | (341.37) | (841.62) | (370.64) | (511.94) |       |   |    |
| Root area [cm²]         | 1818.44  | 1045.96                                    | 760.78   | 838.97   | 788.05   | 2.47   | 125.60   | 44.15    | 4.23   | 1149.49  | 1242.86  | 1035.13  | 417.73   | 0.000 |   |    |
|                         | (156.90) | (278.98)                                   | (129.41) | (94.98)  | (72.51)  | (0.46) | (104.49) | (45.16)  | (1.72) | (83.70)  | (357.48) | (284.23) | (146.67) |       |   |    |
| Avg. diameter [mm]      | 0.25     | 0.40                                       | 0.22     | 0.33     | 0.37     | 0.36   | 0.38     | 1.46     | 0.27   | 0.27     | 0.32     | 0.30     | 0.27     | 0.000 |   |    |
|                         | (0.01)   | (0.20)                                     | (0.02)   | (0.00)   | (0.03)   | (0.01) | 0.03(    | (1.82)   | (0.02) | (0.01)   | (0.02)   | (0.01)   | (0.01)   |       |   |    |

Note: p-value are displayed in bold script when  $p \leq 0.05$

Different letters in significant column indicate Kruskal–Wallis, the value represent mean (standard deviation) in categories column
