# Supplementary material for: Microalgae and Biochar Agro-Fertilization of the Palestinian Rehan Barley Cultivar under Salinity Stress
Source: MDPI journal article supplement (doi:10.3390/agronomy11112309), 2021-11-15
Supplement: s1 [file s1]

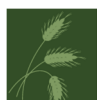

**Table S6.** The comparative effect between dried algae fertilization from 1st treatment (July – Sep. 2019) and dried algae fertilization from 2nd treatment (Aug. – Oct. 2019) on the plant parameters during the early growth stage (7 weeks) of “Rehan” cultivar.

| Parameters                   | Algae fertilization<br>from 1 <sup>st</sup> treatment<br>(July – Sep. 2019) | Algae fertilization<br>from 2 <sup>nd</sup> treatment<br>(Aug. – Oct. 2019) | Sig.  |
|------------------------------|-----------------------------------------------------------------------------|-----------------------------------------------------------------------------|-------|
| No. of tillers               | 1 ± 0.0                                                                     | 6.8 ± 3.5                                                                   | 0.022 |
| No. of ears                  | 0.0 ± 0.0                                                                   | 0.17 ± 0.41                                                                 | 0.317 |
| Leaf area [cm <sup>2</sup> ] | 3.10 ± 0.30                                                                 | 577.4 ± 460.98                                                              | 0.053 |
| Shoot dry weight [g]         | 0.025 ± 0.014                                                               | 2.62 ± 1.49                                                                 | 0.013 |
| Root dry weight [g]          | 0.01 ± 0.0                                                                  | 0.61 ± 0.38                                                                 | 0.007 |
| Shoot/Root dry weight        | 2.5 ± 1.38                                                                  | 4.53 ± 0.93                                                                 | 0.030 |
| Root length [cm]             | 36.23 ± 7.44                                                                | 2151.95 ± 1627.70                                                           | 0.004 |
| Root area [cm <sup>2</sup> ] | 2.47 ± 0.46                                                                 | 956.16 ± 889.92                                                             | 0.004 |
| Avg. diameter [mm]           | 0.22 ± 0.016                                                                | 0.50 ± 0.12                                                                 | 0.004 |

Note: p-value are displayed in bold script when  $p \leq 0.05$

Different letters in significance column indicate Mann-Whitney U Test , the value represent mean ± standard deviation in categories column
