# Supplementary material for: Microalgae and Biochar Agro-Fertilization of the Palestinian Rehan Barley Cultivar under Salinity Stress
Source: MDPI journal article supplement (doi:10.3390/agronomy11112309), 2021-11-15
Supplement: s1 [file s1]

**Table S2.** Hoagland solution recipe with trace elements

| Component                                                | Stock Solution | mL Stock<br>Solution/1 L | salts for Hoagland:                                                                |
|----------------------------------------------------------|----------------|--------------------------|------------------------------------------------------------------------------------|
| <b>Macro-nutrients</b>                                   |                |                          |                                                                                    |
| <b>2M KNO<sub>3</sub></b>                                | 202 g/L        | 2,50                     | Potassium nitrate, KNO <sub>3</sub>                                                |
| <b>2M Ca(NO<sub>3</sub>)<sub>2</sub>•4H<sub>2</sub>O</b> | 236 g/0.5 L    | 2,50                     | Calcium nitrate tetrahydrate, Ca(NO <sub>3</sub> ) <sub>2</sub> •4H <sub>2</sub> O |
| <b>Iron (Sprint 138 iron chelate)</b>                    | 15 g/L         | 1,50                     | Iron(III)-EDTA or Iron chelate, Fe-EDTA or Fe-EDDHA                                |
| <b>2M MgSO<sub>4</sub>•7H<sub>2</sub>O</b>               | 493 g/L        | 1,00                     | Magnesium sulfate heptahydrate, MgSO <sub>4</sub> •7H <sub>2</sub> O               |
| <b>trace elements</b>                                    |                |                          |                                                                                    |
| <b>H<sub>3</sub>BO<sub>3</sub></b>                       | 2.86 g/L       | 1,00                     | Boric acid, H <sub>3</sub> BO <sub>3</sub>                                         |
| <b>MnCl<sub>2</sub>•4H<sub>2</sub>O</b>                  | 1.81 g/L       | 1,00                     | Manganese chloride tetrahydrate, MnCl <sub>2</sub> •4H <sub>2</sub> O              |
| <b>ZnSO<sub>4</sub>•7H<sub>2</sub>O</b>                  | 0.22 g/L       | 1,00                     | Zinc sulfate heptahydrate, ZnSO <sub>4</sub> •7H <sub>2</sub> O                    |
| <b>CuSO<sub>4</sub>•5H<sub>2</sub>O</b>                  | 0.08 g/L       | 1,00                     | Copper sulfate pentahydrate, CuSO <sub>4</sub> •5H <sub>2</sub> O                  |
| <b>H<sub>2</sub>MoO<sub>4</sub>•H<sub>2</sub>O or</b>    | 0.09 g/L       | 1,00                     | Molybdic acid monohydrate, H <sub>2</sub> MoO <sub>4</sub> •H <sub>2</sub> O or    |

|                                                           |          |      |                                                                                                                                                    |
|-----------------------------------------------------------|----------|------|----------------------------------------------------------------------------------------------------------------------------------------------------|
| <b>Na<sub>2</sub>MoO<sub>4</sub>•2H<sub>2</sub>O</b>      | 0.12 g/L | 1,00 | Sodium molybdate dihydrate, Na <sub>2</sub> MoO <sub>4</sub> •2H <sub>2</sub> O                                                                    |
| <b>Phosphate (applied alone to the experimental pots)</b> |          |      |                                                                                                                                                    |
| <b>1M KH<sub>2</sub>PO<sub>4</sub> (pH to 6.0)</b>        | 136 g/L  | 1,00 | Potassium Dihydrogen Phosphate, KH <sub>2</sub> PO <sub>4</sub> or Ammonium Dihydrogen Phosphate, (NH <sub>4</sub> )H <sub>2</sub> PO <sub>4</sub> |
