# Supplementary material for: Microalgae and Biochar Agro-Fertilization of the Palestinian Rehan Barley Cultivar under Salinity Stress
Source: MDPI journal article supplement (doi:10.3390/agronomy11112309), 2021-11-15
Supplement: s1 [file s1]

**Table S4.** The comparative effect between algae fertilization from (Aug. – Oct. 2019), the synergic effect for dried algae and biochar (Sep. – Nov. 2019), and biochar with mineral fertilization effect (July– Sep. 2019) on the plant parameters during the early growth stage (7 weeks) of “Rehan” cultivar.

| Parameters                   | Algae fertilization<br>(Aug. – Oct. 2019) | Algae +biochar fertilization<br>(Sep. – Nov. 2019) | Biochar fertilization (with<br>mineral addition)<br>(July – Sep. 2019) | Sig.         |
|------------------------------|-------------------------------------------|----------------------------------------------------|------------------------------------------------------------------------|--------------|
| No. of tillers               | 6.8 ± 3.5                                 | 3.67 ± 0.73                                        | 9.17 ± 3.43                                                            | <b>0.028</b> |
| No. of ears                  | 0.17 ± 0.41                               | 0.00 ± 0.00                                        | 4.67 ± 1.21                                                            | <b>0.001</b> |
| Leaf area [cm <sup>2</sup> ] | 577.4 ± 460.98                            | 106.21 ± 48.12                                     | 275.50 ± 157.98                                                        | 0.155        |
| Shoot dry weight<br>[g]      | 2.62 ± 1.49                               | 0.57 ± 0.28                                        | 7.22 ± 1.41                                                            | <b>0.002</b> |
| Root dry weight [g]          | 0.61 ± 0.38                               | 0.23 ± 0.03                                        | 2.76 ± 2.86                                                            | <b>0.027</b> |
| Shoot/Root dry<br>weight     | 4.53 ± 0.93                               | 2.37 ± 0.90                                        | 11.36 ± 16.32                                                          | 0.848        |
| Root length [cm]             | 2151.95 ± 1627.70                         | 757.54 ± 126.47                                    | 5496.62 ± 341.37                                                       | <b>0.002</b> |
| Root area [cm <sup>2</sup> ] | 956.16 ± 889.92                           | 102.04 ± 20.18                                     | 1149.49 ± 83.70                                                        | <b>0.041</b> |
| Avg. diameter<br>[mm]        | 0.50 ± 0.12                               | 0.43 ± 0.03                                        | 0.33 ± 0.00                                                            | <b>0.004</b> |

---

**Note:** p-value are displayed in bold script when  $p \leq 0.05$

Different letters in significance column indicate Kruskal–Wallis, the value represent mean  $\pm$  standard deviation in categories column

---
